# Supplementary material
Source: publisher figshare collection journal article supplement (https://tandf.figshare.com/ndownloader/files/15327653)
Supplement: Supplementary file 1 [file 15327653]

## Sheet: OFT post
Supplement Table S5: Results of ophthalmological examination of Usher syndrome Russian cohort. Posterior segment of the eye.
Patient ID	USH Type	Fundus	OCT, central retinal thickness, mkm			ERG / VEP	Colorvision	Visual fields
			OD	OS	description
1	2	on periphery and paramacular zone- bone-speckle pigmentation	na	na	data is indicative of gross retinal pathology OU	severe impairment*	12	concentric visual field narrowing, tunnel vision OS- n/a
2	1	waxy optic discs, peripapillar atrophy, narrowing of vessels, posterior vitreous detachment, OS-atrophic focus 0.5 dd with pigmentation in macula, OU- bone-speckle pigmentation in middle periphery	314	275	the retinal profile is deformed, epiretinal membrane. RPE is thin	severe impairment	na	concentric visual field narrowing, tunnel vision
3	other syndrome	waxy optic discs, olique entry, myopic conus,narrowing of vessels, details not visible because of bad vision fixation	na	na	no central fixation	severe impairment	38	the patient was poorly performing the study due to cognitive impairment
4	2	waxy optic discs, narrowing of vessels, pigment redistribution, bone-specklesthe retina is thinned.	na	na	na	na	na	concentric visual field narrowing, tunnel vision
5	2	waxy optic discs, narrowing of vessels, paramacular distrophic foci, multiple bone-speckles	na	na	no central fixation	severe impairment	na	concentric visual field narrowing, tunnel vision
6	1	waxy optic discs, narrowing of vessels, in MZ pigment redistribution, single bone-speckles	na	na	no central fixation	severe impairment	na	concentric visual field narrowing, tunnel vision
7	1	fundus is not visible	na	na	n/a	severe impairment	na	OU- narrowing of visual field to 0 degrees absolute scotoma
8	2	waxy optic discs, narrowing of vessels, pigment redistribution, bone-specklesthe retina is thinned.	na	na	no central fixation	severe impairment	na	OU- narrowing of visual field to 0 degrees absolute scotoma
9	2	pale optic discs, partial peripapillary atrophy, narrowing of vessels, paramacular dystrophic foci, periphery- pigment redistribution, bone-speckle pigmentation	219	169	the profile of the retina is deformed due to the thinning of all layers, all layers are visualized	severe impairment	na	concentric visual field narrowing, tunnel vision
10	1	waxy optic discs, narrowing of vessels OD>OS, the reflexes are smoothened, (poor fixation of the gaze), middle periphery- bone-speckle pigmentation	169	185	the profile of the retina is deformed due to the thinning of all layers	severe impairment	10	concentric visual field narrowing, tunnel vision
11	2	waxy optic discs, myopic conus,narrowing of vessels, periphery- bone-speckle pigmentation	166	183	center thinning of RPE	n/a	na	OU- narrowing of visual field to 0 degrees absolute scotoma
12	2	OU- waxy optic discs, narrowing of vessels, periphery- bone-speckle pigmentation	244	249	center thinning of thickness	severe impairment	36	concentric visual field narrowing, tunnel vision
13	1	waxy optic discs, narrowing of vessels, pigment redistribution, bone-specklesthe retina is thinned.	na	na	na	na	na	concentric visual field narrowing, tunnel vision
14	other syndrome	pale optic discs, periphery- pigment redistribution, bone-speckle pigmentation	na	na	Not informative because of nystagmus.	severe impairment	na	OU- narrowing of visual field to 0 degrees absolute scotoma
15	1	waxy optic discs, narrowing of vessels,Paramacular and at the periphery bone-speckle pigmentation, cotton-like foci and pathological glitter in the paramacular zone.	na	na	no central fixation	severe impairment	na	OD- absolute scotoma, OS- almost absolute scotoma
16	1	OU- waxy optic discs, narrowing of vessels, In the macular zone, whitish foci, the reflex is smoothed, paramacular and at the periphery bone-speckle pigmentation, OD- 12:30 a grayish spot	219	195	the retinal profile is deformed due to thinning of all layers of the retina	severe impairment	62	absolute scotoma
17	2	waxy optic discs, monotonous, myopic cone, MZ- no reflexes, bone-speckle pigmentation, along the entire surface of the retina, dystrophic foci in the center and along the periphery. Periphery: the retina is hyperinflate	169	52	the retinal profile is deformed due to thinning of all layers of the retina	severe impairment	20	positive circular scotoma, tunnel vision
18	1	pale optic discs, A:V narrowing of vessels, (no bone-speckle pigmentation)	na	na	n/a	Normal	32	concentric peripheral narrowing of the visual fields
19	1	OD- pale optic disc,macula-reflexes are smoothed, pigment dissociation OS- no fixation	na	na	n/a	severe impairment	na	concentric visual field narrowing, tunnel vision
20	2	waxy optic discs, narrowing of vessels, pigment redistribution, bone-specklesthe retina is thinned.	na	na	na	na	na	concentric visual field narrowing, tunnel vision
21	1	waxy optic discs, narrowing of vessels, pigment redistribution, bone-specklesthe retina is thinned.	na	na	na	na	na	concentric visual field narrowing, tunnel vision
22	1	waxy optic discs, narrowing of vessels, pigment redistribution, bone-specklesthe retina is thinned.	na	na	na	na	na	concentric visual field narrowing, tunnel vision
23	1	OU- pale optic discs, arteriesis narrowed, veins broadened, on the middle periphery tbone-speckle pigmentation, pathological glitter in center , dissociation of the pigment. The patient does not fix the gaze.	127	239	the retinal profile is deformed due to thinning of all layers, OS nuclear and plexiform layers are deformed, signs of accumulation of intraretinal fluid (? cyst?)	severe impairment	86	Central and paracentral scotomes
24	2	OU- pale optic discs, monotonous, myopic cone, arteriesis and viens narrowed, the retina is hyperinflated, on the periphery tbone-speckle pigmentation	148	175	the retinal profile is normal, the retina is hiperinflate, the layers of the retina are differentiated, thinned	severe impairment	8	concentric visual field narrowing, tunnel vision
25	1	OU waxy discs, vascular bundle displaced towards the nose, arteries very narrow, veins broadened, full-blooded. In the MZ, the disintegration of pigment, dystrophic foci, paramacular and peripheral bone-speckle pigmentation. The retina is thinned.	na	212	OD-no central fixation OS- all layers are differentiated, the macular profile is normal. Deformation and thickening of the complex Bruch-RPE	severe impairment	na	OU - narrowing of visual field to 0 degrees absolute scotoma
26	1	waxy optic discs, narrowing of vessels, pigment redistribution, bone-specklesthe retina is thinned.	na	na	na	na	na	concentric visual field narrowing, tunnel vision
27	1	OU- disc is pale, peripapillary atrophy, the vessels are narrowed. Macular zone: no reflexes. Periphery: not visible.	na	253	OD-no central fixation OS- The profile of the retina is preserved, all layers are differentiated. Minor thinning of RPE.	Normal	70	Peripheral and central scotoma. Partially tunnel vision. Upper paracentral nasal scotoma and arched temporal scotoma.
28	2	OU - myopic cone, t arteries are narrowed, the extreme periphyria-bone-speckle pigmentation, the retina is hyperinflated.	na	242	OD-bad central fixation OS-retinal profile is preserved, all layers of the retina are differentiated, the thinning of the layers is parafoveolar.	severe impairment	12	concentric visual field narrowing, tunnel vision
* Severe impairment - disorder of impulse conduction through the visual pathway, dramatic reduce of photoreceptor function registration, OD, OS - oculus dexter / sinister (right and left eye), OU oculi utriusque - both eyes, OCT - optical coherent tomography, ERG - electroretinography, VEP - visual evoked potentials, MZ macula zone
